# Knowledge, Attitude and Practice (KAP) Survey about hepatitis B (HBV) and C (HCV) among migrant populations from Sub-Saharan Africa

Frhat M. A. Saaed<sup>1</sup>

<sup>1</sup>Department of Zoology, College of Arts and Sciences, Benghazi University, Al Kufra, Libya

Jerry E. Ongerth<sup>2\*</sup>

<sup>2</sup>Environmental Engineering, University of Wollongong, Wollongong, NSW, 2522, Australia  
jongerth@uow.edu.au; +61 0408548427

Muna H. Ali<sup>3</sup>

<sup>3</sup>Department of Mathematics, Faculty of Arts & Science Kufrah, Benghazi University, Libya.

## Abstract:

**Background:** Hepatitis B and C virus infections are serious blood borne diseases with global health concern particularly in developing countries. The association between survey participant's knowledge, attitude, and practices (KAP) about HBV and HCV infection is rarely studied, particularly among migrants seeking resettlement. Libya is a main transient station for migrants northward toward Europe and the flow is increasing into Al Kufra from neighboring countries that have endemic intermediate and high HBV and HCV prevalence. The purpose of this exploratory descriptive study in Al Kufra was to assess the level of participating migrant's KAP, regarding cause, transmission, prevention, and treatment of viral hepatitis due to HBV and HCV. **Method:** A cross-sectional study was conducted among 674 sub-Saharan African migrants in Al Kufra, Libya from January to October 2021. Migrant's KAP about HBV and HCV infection was assessed by interview questionnaire. Statistical and data analysis used SPSS version of 25. **Results:** Out of 700 questionnaires distributed, 674 were returned with a response rate of 96.3%. The study population included 580 (86.1%) males, mean age of 29.6 ± 7.2 SD years. A majority, 508 (75.4%) were illiterate and elementary level, 8 2.483+.232, respectively. Positive significant linear correlations were found between knowledge-attitude ( $r = 0.524$ ,  $p < 0.01$ ) knowledge-practice ( $r = 0.123$ ,  $p < 0.01$ ) and attitude-practice ( $r = 0.278$ ,  $p < 0.01$ ). Ethnicity and education variables were significantly associated with mean KAP. Gender identity and marital status were both significantly associated with mean knowledge and attitude. **Conclusion:** The migrant population from the neighboring and sub-Saharan African countries have inadequate KAP about HBV and HCV to limit infection.

**Keywords:** Knowledge, Attitude, Practice, hepatitis B, hepatitis C, Migrant, sub-Saharan

NOTE: This preprint reports new research that has not been certified by peer review and should not be used to guide clinical practice.

## **Introduction:** 37

Viral hepatitis B and C are blood borne viruses that infect millions of people worldwide. 38

Infections with hepatitis B virus (HBV) and C (HCV) virus are leading causes of chronic liver 39  
disease, cirrhosis, liver cancer and associated morbidity and mortality worldwide and are a 40  
primary indication for liver transplantation [19]. Chronic HBV and HCV infections are 41  
responsible for nearly 57% of liver cirrhosis cases (HBV 30%, HCV 27%) and 78% of 42  
hepatocellular carcinomas (HBV 53%, HCV 25%), the third most common cause of cancer 43  
deaths worldwide [12, 24, 25]. 44

The endemicity of HBV is high in developing areas, including Africa, the Middle East and 45  
Southeast Asia, where at least 8% of the population are HBV chronic carriers [39, 24]. The 46  
largest burden of morbidity and mortality from chronic liver disease continues to be in nations 47  
of the developing world. For example, 5–10% of the adult population in East Asia and sub- 48  
Saharan Africa are estimated to have chronic HBV infection [28]. The highest reported 49  
prevalence of chronic HCV is in Africa. Egypt has the highest prevalence of HCV, with some 50  
studies reporting HCV antibody positive rates of up to 15%, with an estimated 10% with 51  
chronic viremia [14, 11]. Viral hepatitis disproportionately affects sub- Saharan Africans 52  
populations [10, 13, 31, 34, 41, 42] with high rates of migration from countries where 53  
childhood HBV vaccination has only recently been implemented [15]. 54

The hepatitis B vaccine is the mainstay of HBV prevention [38]. No vaccine is available for 55  
HCV, dictating the importance of education and precautions [38]. These viruses are blood- and 56  
bodily fluid-borne, transmitted most commonly through sharing of injection equipment, reuse 57  
or poorly sterilized of medical equipment, especially syringes and needles and sharp objects, 58  
sexual contact, and mother to child transmission [4, 16, 21]. 59

Countries of high HBV & HCV prevalence are often economically disadvantaged and areas of 60  
conflict that are a source of migrants seeking stable high-income regions including Europe and 61

North America. This poses challenges to the public health and immigration systems in the host nations [28] and countries along migration routes [26]. In 2020 the total of international migrants was 280.6 million, making this group the 5th most populous nation [38; 22]. Many migrants move into and remain part of ethnic minority groups maintaining traditional social and cultural behaviors that are reinforced and persist and may have adverse implications for exposure to HBV and HCV [30].

Countries such as Libya along migration routes from countries with high prevalence of viral hepatitis, e.g., sub-Saharan African countries have special problems. Migrants typically suffer from infectious diseases that are more prevalent in countries of origin [14, 26]. Migrants from neighboring and sub-Saharan African countries have been cited as one of the major factors spreading the chronic liver disease and hepatocellular carcinoma with risks of disease transmission to the local population [8, 29]. Lack of access to health care services, lack of basic knowledge, poor to nonexistent personal hygiene, and the inability to obtain information about the transmission and prevention all contribute to the importance of defining issues leading to improvement.

The knowledge, attitudes, and practices (KAP) about viral hepatitis transmission, prevention, and liver disease progression among immigrant populations from the neighboring and sub-Saharan African countries is likely to have significant bearing on transmission. Studies show that awareness of chronic HBV or HCV in most populations is low but that among migrant populations it tends to be even lower [30; 36]. A combination of factors contributes to disease propagation, including poor knowledge of the diseases, their risk factors and symptoms, lack of access to healthcare and health information, stigma associated with disease, as well as the lack of symptoms from the early stages of liver disease such as viral hepatitis [30; 33; 34]. General knowledge in immigrant populations is not adequate to avoid blood borne diseases. Social and cultural norms, unsafe sexual intercourse, exposure to the blood or body fluids of

an infected person, and intravenous drug use may increase the risk of HBV and HCV infection. 87  
Furthermore, minimal education and resources, isolation, and stress contribute the refugees 88  
tendency to engage in risky behavior, increasing the risk of these infections [28]. The purpose 89  
of this study is to determine the state of knowledge, attitudes, and practices related to HBV and 90  
HCV, transmission, consequences, treatment and prevention. 91

## **Methods:** 92

The study was conducted from January 1 to October 31, 2021 at the Libyan Red Crescent, Al 93  
Kufra branch laboratory in a high migrant area. The study area is located in the southeast of 94  
Libya having borders with Egypt to the East and with Sudan and Chad to the South. It is 1700 95  
km from Tripoli, the capital city of Libya and 900 km South of the nearest Mediterranean port. 96  
The study population of migrants attending at the Libyan Red Crescent Al Kufra branch 97  
laboratory included 674 apparently healthy males and females, aged 21–52 years. Knowledge, 98  
attitudes, and practices related to HBV and HCV infection were assessed by questionnaire 99  
specially designed to permit literacy-independent answers. Questions concerned awareness, 100  
beliefs, and attitudes focusing on the causes, transmission, prevention, and treatment of viral 101  
hepatitis (Appendix 1-3). Subject categories included behaviors contributing to infection risk 102  
with both HBV and HCV; sociodemographic data; and practices of the study population 103  
regarding viral hepatitis. A pre-designed, structured questionnaire sheet was completed inside 104  
the laboratory by direct personal interview with each migrant individually. The questionnaire 105  
was developed and adapted through extensive literature review in English language [1; 5; 20; 106  
31; 40]. The questions in knowledge section were further divided into 3 main sections (see 107  
Appendix A): the first 19 knowledge questions were general on viral hepatitis diseases; seven 108  
significant viral hepatitis transmission risk factors were included in question 20. Question 21 109  
includes eight common complications of HBV and HCV infections. The attitude and practice 110

section of questionnaire consist of 13 and 12 questions, respectively. The demographic items 111  
included age, gender, education level, and ethnicity. 112

### **Statistical Analysis:** 113

Data were analyzed using Statistical Package for Social Sciences (SPSS) v. 25.0. The relationship 114  
between independent categorical variables and the main outcomes of the study (knowledge, attitude, 115  
and practice related to transmission and prevention of HBV and HCV infection) were tested using Chi- 116  
square test. The p-value < 0.05 was considered to be significant. Descriptive statistics were used to 117  
illustrate migrants' demographic characteristics. Categorical variables were measured as 118  
percentages while continuous variables were expressed as mean  $\pm$  standard deviation. 119  
Normality of data was tested using Kolmogorov-Smirnov test. Inferential statistics involving 120  
Chi-square test, Mann-Whitney U test, Kruskal Wallis H test were used to assess the difference 121  
while Spearman's rank correlation coefficient was used to evaluate the relationship between 122  
the study variables. Cronbach's alpha was calculated as an indication of internal consistency. 123

### **Ethics Approval:** 124

Written informed consent was obtained from the study participants after they have been clearly 125  
briefed about the objective of the study. They were informed about their right to refuse to 126  
participate in the study. 127

### **Results:** 129

Descriptive statistics for each item in the questionnaire are given in Appendix Tables A1, A2, 130  
and A3. A total of 674 African migrants from sub-Saharan Africa, 43.8% Eritrean, 26.6%, 131  
Somalian, 21.7%, Ethiopian, and 8% Sudanese, participated in this study (Table 1). Among the 132  
674 participants, 87.5% were married, 86.1% were male and 13.9% female. The age range was 133  
21–52 years old with a mean age of 29.6 years. A majority of the participants, 75.4%, were 134

illiterate or had a basic education level, while 24.6% of participants had a high school level or above (Table 1).

**Table 1.** Sub-Saharan African migrant study population demography (n=674)

| <b>Migrants Characteristics</b> | <b>N (%)</b> |
|---------------------------------|--------------|
| <b>Age (Mean ± SD)</b>          | 29.6 ± 7.2   |
| <b>Gender identity</b>          |              |
| Male                            | 580 (86.1%)  |
| Female                          | 94 (13.9%)   |
| <b>Ethnicity</b>                |              |
| Eritrean                        | 295 (43.8%)  |
| Somalian                        | 179 (26.6%)  |
| Ethiopian                       | 146 (21.7%)  |
| Sudanese                        | 54 (8%)      |
| <b>Marital Status</b>           |              |
| Single                          | 84 (12.5%)   |
| Married                         | 590 (87.5%)  |
| <b>Education level</b>          |              |
| Illiterate/Basic education      | 508 (75.4%)  |
| High school and above           | 166 (24.6%)  |

Of the 700 distributed questionnaires, 674 were returned with a response rate of 96.3%. The Kolmogorov-Smirnov test revealed non normal distribution of the data. The Cronbach's alpha of the questionnaire was 0.76 for individual domains, maximum Cronbach's alpha was for attitude section followed by practices and knowledge section. The reason for low Cronbach's alpha for knowledge domain might be due to the number of questions as compared to attitude and practices sections.

Overall, knowledge regarding HBV and HCV was poor, Table 1a. more than 40% of participants answered Don't know to the 37 questions reflecting understanding. Most (34 of 37) questions had an answer either correct or not, of these, only 16% of migrants' answers were correct. For questions of overall indicative knowledge, more than 8 out of 10 migrants, 83.0%, had never heard of viral hepatitis. Less than 1 out of 10 migrants, 7.9%, could identify hepatitis B and C as viral infections (Table 2a). More than 90% of participants had no knowledge about the transmission of HBV and HCV and did not know that a simple test could identify HBV and HCV infections.

**Table 2a. Knowledge segment, KAP study of migrant African populations regarding HBV and HCV infection in Al Kufra, Libya, 2021 (n = 674; 609 male (M), 94 female (F))**

| <b>2a. Knowledge assessment questions</b>                                                               | <b>Item</b> | <b>Yes (%)</b> | <b>No (%)</b> | <b>% Correct</b> | <b>(%) Don't know</b> |
|---------------------------------------------------------------------------------------------------------|-------------|----------------|---------------|------------------|-----------------------|
| <b>General questions:</b>                                                                               |             |                |               |                  | <b>Avg (33.8)</b>     |
| 1. Have you ever heard about viral hepatitis?                                                           | 1           | 115 (17.1%)    | 472(70.0%)    | na               | 87(12.9%)             |
| 2. Are Hepatitis B and C viral infection diseases?                                                      | 2           | 53 (7.9%)      | 500(74.2%)    | 7.9              | 121(18.0%)            |
| 3. Can hepatitis B or C be transmitted by contact with open wound/cut?                                  | 3           | 41 (6.1%)      | 490(72.7%)    | 6.1              | 143(21.2%)            |
| 4. Can hepatitis B and C virus be spread by someone who looks healthy?                                  | 4           | 58 (8.6%)      | 405(60.1%)    | 8.6              | 211(31.3%)            |
| 5. Is there a test that shows whether or not someone is hepatitis B or C positive?                      | 5           | 62 (9.2%)      | 304(45.1%)    | 9.2              | 308(45.7%)            |
| 6. Do you think people with hepatitis B can be infected for life?                                       | 6           | 36 (5.3%)      | 411(61.0%)    | 5.3              | 227(33.7%)            |
| 7. Is there a vaccine for HBV?                                                                          | 7           | 37 (5.5%)      | 298(44.2%)    | 5.5              | 339(50.3%)            |
| 8. Can hepatitis B be cured?                                                                            | 8           | 202(30.0%)     | 91 (13.5%)    | 30.0             | 381(56.5%)            |
| 9. Can hepatitis C be cured?                                                                            | 9           | 130(19.3%)     | 319(47.3%)    | 19.3             | 225(33.4%)            |
| 10. Can HBV and HCV infection be passed from mother to child?                                           | 10          | 117 (17.4%)    | 205(30.4%)    | 17.4             | 352(52.2%)            |
| 11. Can HBV and HCV be spread through social contact (e.g. shaking hands, sharing food or sneezing)?    | 11          | 362(53.7%)     | 68(10.1%)     | 10.1             | 244(36.2%)            |
| 12. Can hepatitis infection cause death?                                                                | 12          | 147 (21.8%)    | 196(29.1%)    | 21.8             | 331(49.1%)            |
| 13. Can people with Hepatitis B or C donate blood?                                                      | 13          | 411 (61.0%)    | 166 (24.6%)   | 24.6             | 97 (14.4%)            |
| 14. Can HCV infection be prevented?                                                                     | 14          | 427 (63.4%)    | 126 (18.7%)   | 63.4             | 121(18.0%)            |
| 15. Can HBV infection be prevented?                                                                     | 15          | 234(34.7%)     | 247(36.6%)    | 59.1             | 193(28.6%)            |
| 16. Can Hepatitis B and C be transmitted through air and water?                                         | 16          | 398 (59.1%)    | 97 (14.4%)    | 14.4             | 179(26.6%)            |
| 17. Have you ever been screened for HBV and HVC?                                                        | 17          | 115 (17.1%)    | 559 (82.9%)   | na               | 0 (0.0%)              |
| 18. Have you been vaccinated against hepatitis B?                                                       | 18          | 11 (1.6%)      | 663 (98.4%)   | na               | 0 (0.0%)              |
| 19. Is a vaccine for Hepatitis C available?                                                             | 19          | 413 (61.3%)    | 93 (13.8%)    | 13.8             | 168 (24.9%)           |
| <b>Significant risk factor questions:</b>                                                               |             |                |               |                  | <b>Avg (48.0)</b>     |
| 20. Can HBV and HCV be transmitted by un-sterilized syringes and needles?                               | 20          | 66 (9.8%)      | 298 (44.2%)   | 9.8              | 310 (46.0%)           |
| 21. Are HBV and HCV passed through contact with infectious blood, blood products and body fluids?       | 21          | 39 (5.8%)      | 290 (43.0%)   | 5.8              | 345 (51.2%)           |
| 22. Can viral hepatitis B and C be transmitted by sharing needles for use drug?                         | 22          | 70 (10.4%)     | 404 (59.9%)   | 10.4             | 200(29.7%)            |
| 23. Can viral hepatitis B and C be transmitted by tattooing or body piercing?                           | 23          | 44 (6.5%)      | 294 (43.6%)   | 6.5              | 336 (49.9%)           |
| 24. Can viral hepatitis B and C be transmitted by sharing personal care items like toothbrush or razor? | 24          | 60 (8.9%)      | 198 (29.4%)   | 8.9              | 416(61.7%)            |
| 25. Can hepatitis B and C be transmitted through sexual contact?                                        | 25          | 83 (12.3%)     | 229 (34.0%)   | 12.3             | 362 (53.7%)           |
| 26. Can HBV and HCV be transmitted by a lack of sanitation services like bathrooms?                     | 26          | 257 (38.1%)    | 121(18.0%)    | 38.1             | 296 (43.9%)           |
| <b>Common complications questions:</b>                                                                  |             |                |               |                  | <b>Avg (53.3)</b>     |
| 30. Can a person be a carrier of HBV and HCV and can infect others without knowing it?                  | 30          | 88 (13.1%)     | 310 (46.0%)   | 13.1             | 276(40.9%)            |
| 31. Can HBV and HCV infections result in chronic hepatitis?                                             | 31          | 112(16.6%)     | 223 (33.1%)   | 16.6             | 339 (50.3%)           |
| 32. Can HBV and HCV infections result in liver cancer?                                                  | 32          | 97 (14.4%)     | 174 (25.8%)   | 14.4             | 403 (59.8%)           |
| 33. Can HBV and HCV infections lead to liver cirrhosis?                                                 | 33          | 78 (11.6%)     | 198 (29.4%)   | 11.6             | 398 (59.1%)           |
| 34. Can HBV and HCV infections lead to fulminant hepatitis?                                             | 34          | 57 (8.5%)      | 157 (23.3%)   | 8.5              | 460 (68.2%)           |
| 35. Can HBV and HCV infections cause yellow skin and eyes (jaundice) ?                                  | 35          | 72 (10.7%)     | 234 (34.7%)   | 10.7             | 368 (54.6%)           |
| 36. Can HBV and HCV infections cause liver failure?                                                     | 36          | 112 (16.6%)    | 262 (38.9%)   | 16.6             | 300 (44.5%)           |
| 37. Can HBV and HCV infections cause death?                                                             | 37          | 58 (8.6%)      | 287 (42.6%)   | 8.6              | 377 (55.8%)           |
| <b>Average %</b>                                                                                        |             |                |               | <b>16.4</b>      | <b>Avg (42.0)</b>     |

A majority, 86.5% falsely believed that hepatitis B could be cured (or didn't know), while nearly half, 47.3% believed that hepatitis C is not curable although a third (33.4%) 'did not know'. The vast majority, 98.4% did not know that an HBV vaccine existed and only 1.6% of the migrants had been vaccinated. Moreover, 82.9% had never been screened for HBV.



Knowledge of risk factors was also very poor. The overwhelming majority had no understanding that HBV and HCV could be transmitted by mechanisms including: by unsterilized syringes, 90.2%; by blood products and body fluids, 94.2%; and by sharing needles, 89.6%. Furthermore, similarly high majorities did not understand that both HBV & HCV could be transmitted by tattooing, 93.5%, sharing personal care items 91.0%, and through sexual contact, 87.7%, (Table 2). Among the 674 migrant participants, only ca. one in 10 understood that complications of chronic hepatitis include liver cancer, liver cirrhosis, fulminant hepatitis, and liver failure (Table 2a).

Results of attitude assessment indicated that nearly 90% of the migrants were not concerned about being infected with HBV or HCV and did not consider the infections a public health problem Table 2b. Only about 20% believed that they could get HBV or HCV infections and 15% were not worried about it. Only 15% agreed that migrants

**Table 2b. Attitude assessment of the migrant population regarding HBV and HCV.**

| <b>2b. Attitude assessment questions</b>                                                                  | <b>Item no.</b> | <b>Definitely Agree</b> | <b>Moderately agree</b> | <b>Neutral</b> | <b>Moderately disagree</b> |
|-----------------------------------------------------------------------------------------------------------|-----------------|-------------------------|-------------------------|----------------|----------------------------|
| 1. I have no concern for being infected with hepatitis B or C.                                            | 1               | 83(12.3%)               | 164(24.3%)              | 295(43.8%)     | 80(11.9%)                  |
| 2. Hepatitis B vaccine is safe and effective.                                                             | 2               | 23(3.4%)                | 36(5.3%)                | 369(54.7%)     | 176(26.1%)                 |
| 3. All African migrant populations should be tested for hepatitis B or C before they receive health care. | 3               | 38(5.6%)                | 74(11.0%)               | 259(38.4%)     | 198(29.4%)                 |
| 4. I don't feel comfortable living with people with hepatitis B or C.                                     | 4               | 20(3.0%)                | 64(9.5%)                | 446(66.2%)     | 121(18.0%)                 |
| 5. I believe that hepatitis infections can be transmitted through food.                                   | 5               | 49(7.3%)                | 182(27.0%)              | 340(50.4%)     | 78(11.6%)                  |
| 6. I think hepatitis B is a curable disease.                                                              | 6               | 87(12.9%)               | 167(24.8%)              | 369(54.7%)     | 27(4.0%)                   |
| 7. I think that hepatitis B and C is a serious public health problem.                                     | 7               | 119(17.7%)              | 138(20.5%)              | 285(42.3%)     | 96(14.2%)                  |
| 8. I can get hepatitis infection.                                                                         | 8               | 45(6.7%)                | 91(13.5%)               | 341(50.6%)     | 138(20.5%)                 |
| 9. Viral hepatitis is something to worry about.                                                           | 9               | 33(4.9%)                | 74(11.0%)               | 260(38.6%)     | 221(32.8%)                 |
| 10. I believe that vaccination could prevent transmission.                                                | 10              | 49(7.3%)                | 111(16.5%)              | 244(36.2%)     | 197(29.2%)                 |
| 11. I believe that healthy people need vaccination.                                                       | 11              | 27(4.0%)                | 117(17.4%)              | 221(32.8%)     | 243(36.1%)                 |
| 12. I believe that you need a vaccination at your age.                                                    | 12              | 22(3.3%)                | 70(10.4%)               | 503(74.6%)     | 41(6.1%)                   |
| 13. I believe that vaccine can be free or low cost through certain programs.                              | 13              | 34(5.0%)                | 38(5.6%)                | 267(39.6%)     | 188(27.9%)                 |

should be tested and less than 10% of participants agreed that the HBV vaccine is safe and effective (Table 2b). Similar to the knowledge response (Table 1a), less than 10% of participants believed or didn't know that HBV was not curable. Reflecting lack of concern, more than 90% of participants we felt comfortable living with people with hepatitis B or C, while 34.3% of the migrants believed that HBV and HCV infection could be transmitted by



food. More than two thirds of participants showed a negative attitude towards vaccination 179  
(Table 2b). 180

Participating migrant responses to practice assessment questions indicate many unsafe 181  
practices that may result in exposure to blood- and body fluid-borne diseases. Very few, 4.3%, 182  
indicated that they would seek further diagnosis and treatment if they tested positive for HBV 183  
or HCV, Table 2c. Very few indicated a ready source of information about hepatitis B or C, 184  
social networks, 4.9%, or friends, 8.0%. Responses reflecting lack of knowledge or reliable 185  
source of information, very high proportions of participants indicated high-risk practices for 186  
transmission: 84% indicated shared use of injecting materials; 81% indicated shared intravenous 187  
drug use; almost all, 98% indicated sharing shaving materials; and with a high rate of sexual 188  
activity, ca. 90%, 189

**Table 2c. Practice assessment of migrant the population regarding HBV and HCV** 190

| <b>2c. Practice assessment questions</b>                                                                        | <b>Item</b> | <b>Always</b> | <b>Frequently</b> | <b>Sometimes</b> | <b>Rarely</b> |
|-----------------------------------------------------------------------------------------------------------------|-------------|---------------|-------------------|------------------|---------------|
| 1. How often do you go for further investigation and treatment in case you are diagnosed with Hepatitis B or C? | 1           | 11(0.02%)     | 7(0.01%)          | 12(0.02%)        | 9(0.01%)      |
| 2. How often are social networks on the internet your source of hepatitis B or C information?                   | 2           | 15(0.02%)     | 2(0.003%)         | 5(0.007%)        | 11(0.02%)     |
| 3. How often are friends as your source of hepatitis B or C information?                                        | 3           | 13(0.02%)     | 10(0.02%)         | 17(0.03%)        | 14(0.02%)     |
| 4. How often do you use a used needle/syringe by more than one person?                                          | 4           | 147(21.8%)    | 155(23.0%)        | 187(27.7%)       | 108(16.0%)    |
| 5. How often do you share intravenous drug use?                                                                 | 5           | 134(19.9%)    | 144(21.4%)        | 173(25.7%)       | 127(18.8%)    |
| 6. How often are razors and shaving blades used by more than one person?                                        | 6           | 366(54.3%)    | 247(36.6%)        | 36 (5.3%)        | 14(2.1%)      |
| 7. How often do you screen for hepatitis B or C?                                                                | 7           | 5(0.01%)      | 11(0.02%)         | 97(14.4%)        | 2(0.003%)     |
| 8. How often have you had sex within the last 12 months?                                                        | 8           | 147(21.8%)    | 175(26.0%)        | 197(29.2%)       | 80(11.9%)     |
| 9. How often have you used condoms with non-steady/steady sexual partners within the last 12 months?            | 9           | 5(0.01%)      | 2(0.003%)         | 7(1.0%)          | 2(0.003%)     |
| 10. How often do you wash hands with tap water and soap?                                                        | 10          | 71(10.5%)     | 93(13.8%)         | 142(21.1%)       | 161(23.9%)    |
| 11. How often do you refuse shaving with used instruments?                                                      | 11          | 46(6.8%)      | 114(16.9%)        | 127(18.8%)       | 143(21.2%)    |
| 12. How often do you share eating utensils?                                                                     | 12          | 627(93.0%)    | 20(0.03%)         | 14(0.02%)        | 8(0.01%)      |

almost none indicated use of condoms. Reflecting lack of understanding the implications of 191  
high-risk practices, very few, ca 15%, ever went for hepatitis B or C screening. 192

Inferential statistics, i.e., Mann-Whitney U and Kruskal Wallis H tests were applied to compare 193  
scores of each domain with various demographic factors Table 3. Mean knowledge and attitude 194  
scores of male and female differed for  $p < 0.05$ . Male showed higher knowledge and attitude 195

than females. Eritrean migrants had significantly higher mean knowledge and practice scores 196  
than other demographic groups. The mean knowledge scores were significantly higher among 197  
single than married migrants, while 198

**Table 3. Comparison of demographic characteristics for mean knowledge, attitude and 199  
practice scores 200**

| Demographic variables      | K.score<br>0.794+.204<br>Mean rank | P-<br>value | A.score<br>2.906+.380<br>Mean rank | P-<br>value | P.score<br>2.483+.232<br>Mean rank | P-<br>value |
|----------------------------|------------------------------------|-------------|------------------------------------|-------------|------------------------------------|-------------|
| <b>Gender identity**</b>   |                                    |             |                                    |             |                                    |             |
| Male                       | 355.27                             | 0.001       | 343.47                             | 0.047       | 335.08                             | 0.418       |
| Female                     | 227.85                             |             | 300.66                             |             | 352.43                             |             |
| <b>Ethnicity*</b>          |                                    |             |                                    |             |                                    |             |
| Eritrean                   | 362.56                             | 0.024       | 371.98                             | 0.001       | 363.24                             | 0.007       |
| Somalian                   | 320.64                             |             | 288.41                             |             | 317.97                             |             |
| Ethiopian                  | 309.08                             |             | 305.26                             |             | 331.08                             |             |
| Sudanese                   | 333.32                             |             | 399.03                             |             | 278.99                             |             |
| <b>Marital Status**</b>    |                                    |             |                                    |             |                                    |             |
| Single                     | 379.88                             | 0.033       | 340.07                             | 0.897       | 292.05                             | 0.021       |
| Married                    | 331.47                             |             | 337.13                             |             | 343.97                             |             |
| <b>Education level**</b>   |                                    |             |                                    |             |                                    |             |
| Illiterate/Basic education | 291.61                             | 0.001       | 305.40                             | 0.001       | 352.02                             | 0.001       |
| High school and above      | 477.94                             |             | 435.72                             |             | 293.06                             |             |

\* Kruskal Wallis Test, \*\* Mann Whitney Test, *P-value < 0.05 is statistically significant.* 202

the mean practice score of married migrants was significantly higher than among single 203  
migrants. Finally, significantly higher differences were observed between mean knowledge and 204  
attitude scores for migrants with high school education compared to those with illiterate/basic 205  
education. However, those having high school education had significantly lower mean practice 206  
scores. 207

A correlation between different domains of questionnaire was also assessed. The correlation 208  
revealed significant positive linear correlations between knowledge-attitude ( $r = 0.524$ ,  $p <$  209  
 $0.01$ ) knowledge-practice ( $r = 0.123$ ,  $p < 0.01$ ) and attitude-practice ( $r = 0.278$ ,  $p < 0.01$ ), as 210  
shown in Table 4. 211

**Table 4 Correlation between knowledge, attitude, and practice scores 212**

| Variables           | Correlation coefficient | P-value* |
|---------------------|-------------------------|----------|
| Knowledge, attitude | 0.524                   | 0.01     |
| Knowledge, practice | 0.123                   | 0.01     |
| Practice, Attitude  | 0.278                   | 0.01     |

\*Correlation significant at 0.01 level (2 tailed). 213

Using chi-square test, for knowledge scores of the study participants were divided into two 214  
categories: good, and poor. Attitude and practice scores of the study participants were divided 215

into three categories: good, fair and poor. On this basis, knowledge was 'Poor', >85%, across all categories of gender, ethnicity, and marital status (Table 5). Attitudes could be considered 'Fair' for most categories. But practices were considered 'Poor' for > 2/3's of participants across all categories.

**Table 5 Categorization of the study African migrant populations score on KAP domains**

| Variable               | Knowledge |    |       |     |       | p-value | Attitude |       |      |       |      | p-value | Practices |   |      |     |       | p-value |       |       |
|------------------------|-----------|----|-------|-----|-------|---------|----------|-------|------|-------|------|---------|-----------|---|------|-----|-------|---------|-------|-------|
|                        | Good      |    | Poor  |     | Good  |         | Fair     |       | Poor |       | Good |         | Fair      |   | Poor |     |       |         |       |       |
|                        | n         | n  | %     | n   | %     | n       | %        | n     | %    | n     | %    | n       | %         | n | %    | n   | %     |         |       |       |
| <b>Gender identity</b> |           |    |       |     |       |         |          |       |      |       |      |         |           |   |      |     |       |         |       |       |
| Male                   | 580       | 70 | 12.1% | 510 | 87.9% | 0.486   | 77       | 13.3% | 418  | 72.1% | 85   | 14.7%   | 0.649     | 5 | 0.9% | 140 | 24.1% | 435     | 75.0% | 0.014 |
| Female                 | 94        | 9  | 9.6%  | 85  | 90.4% |         | 10       | 10.6% | 72   | 76.6% | 12   | 12.8%   |           | 1 | 1.1% | 34  | 36.2% | 59      | 62.8% |       |
| <b>Ethnicity</b>       |           |    |       |     |       |         |          |       |      |       |      |         |           |   |      |     |       |         |       |       |
| Eritrean               | 295       | 26 | 8.8%  | 269 | 91.2% | 0.188   | 16       | 5.4%  | 258  | 87.5% | 21   | 7.1%    | 0.001     | 2 | 0.7% | 93  | 31.5% | 200     | 67.8% | 0.036 |
| Somalian               | 179       | 26 | 14.5% | 153 | 85.5% |         | 26       | 14.5% | 111  | 62.0% | 42   | 23.5%   |           | 1 | 0.6% | 47  | 26.3% | 131     | 73.2% |       |
| Ethiopian              | 146       | 21 | 14.4% | 125 | 85.6% |         | 34       | 23.3% | 88   | 60.3% | 24   | 16.4%   |           | 1 | 0.7% | 25  | 17.1% | 120     | 82.2% |       |
| Sudanese               | 54        | 6  | 11.1% | 48  | 88.9% |         | 11       | 20.4% | 33   | 61.1% | 10   | 18.5%   |           | 2 | 3.7% | 9   | 16.7% | 43      | 79.6% |       |
| <b>Marital Status</b>  |           |    |       |     |       |         |          |       |      |       |      |         |           |   |      |     |       |         |       |       |
| Single                 | 84        | 14 | 16.7% | 70  | 83.3% | 0.132   | 11       | 13.1% | 61   | 72.6% | 12   | 14.3%   | 0.998     | 1 | 1.2% | 11  | 13.1% | 72      | 85.7% | 0.017 |
| Married                | 590       | 65 | 11.0% | 525 | 89.0% |         | 76       | 12.9% | 429  | 72.7% | 85   | 14.4%   |           | 5 | 0.8% | 163 | 27.6% | 422     | 71.5% |       |
| <b>Education Level</b> |           |    |       |     |       |         |          |       |      |       |      |         |           |   |      |     |       |         |       |       |
| Basic                  | 508       | 16 | 3.1%  | 492 | 96.9% | 0.005   | 76       | 15.0% | 429  | 84.4% | 85   | 16.7%   | 0.001     | - |      | 146 | 28.7% | 362     | 71.3% | 0.024 |
| High School            | 166       | 63 | 38.0% | 103 | 62.0% |         | 64       | 38.6% | 86   | 51.8% | 16   | 9.6%    |           | 6 | 3.6% | 28  | 16.9% | 132     | 79.5% |       |

*P* < 0.05 was set as statistically significant

## Discussion:

Currently, the flow of immigrants into Libya from neighboring countries is increasing. However, there are no post-arrival screening mechanisms for hepatitis B and C viruses to assess migrant conditions or to support public health policy or actions. Accordingly, the purpose of this study was to assess the level of participating migrant's knowledge, attitude, and practices, regarding cause, transmission, prevention and treatment of viral hepatitis due to HBV and HCV. Libya public health professionals are concerned as the country as a whole is classified among geographical regions with low-intermediate endemicity for hepatitis B virus infection and an area of low endemicity for hepatitis C. The prevalence of hepatitis B surface antigen

(HBsAg) and anti-HCV antibodies in sub-Saharan African migrants has been found to exceed 233  
30-50% indicating significant cause for concern (27). A plausible reason for this high 234  
prevalence appears related to the lack of knowledge about HBV and HCV, their health 235  
significance, their means of transmission, of actions for preventing infection. 236  
The present study assessed the participant's knowledge, attitude, and practices about HBV and 237  
HCV infection. Results clearly show poor KAP towards HBV and HCV among migrants at Al 238  
Kufra. An overwhelming lack of knowledge about HBV and HCV, their mode of transmission, 239  
and the possibility of prevention by vaccination. was observed among participating migrants 240  
Most of these sub-Saharan participants did not know typical ways of transmission, prevention, 241  
and development of liver disease. In addition, participants were not aware of the different types 242  
of viral hepatitis and did not have access to information about their consequences. Only just 243  
over 15% the migrants in our study had basic knowledge about HBV and HCV as a disease of 244  
liver, consistent with a previous report of an Ethiopia study in which just 11.0% of the refugees 245  
know the relationship between liver cancer and hepatitis B and C. Ethiopia has a population- 246  
wide prevalence of 7.4 and 3.1% for HBV and HCV respectively [5]. 247  
Most of the migrants in this study, 84.12%, did not consider HBV and HCV as a real risk for 248  
themselves and for their family. Although this may explain their inadequate practices it almost 249  
certainly contributes to high rates of HBV and HCV infection [27]. Migrants participating in 250  
this study showed poorly supported attitudes and exceedingly poor practices towards HBV and 251  
HCV reflecting their very low state of knowledge important to minimizing risk and infection. 252  
A wide range of unsafe practices are evident in the survey responses, exposing the migrants to 253  
infection by blood borne diseases. 254

## **Conclusions:** 255

In this screening study, the level of knowledge and awareness of migrant African populations 256  
transiting Libya was poor about the concepts of infectious risk associated HBV and HCV. Poor 257

knowledge and lack of awareness of the African immigrants about HBV and HCV must 258  
contribute to the prevalence of these infections in developing countries compared with 259  
developed ones. Survey results demonstrate that knowledge on transmission is lacking, and 260  
awareness about HBV and HCV transmission to others is only fair. Lacking information about 261  
transmission and prevention migrants are at risk of contracting HBV and HCV emphasizing 262  
the need for education to limit the spread of the blood borne disease. Opportunities exist for 263  
attention by Libyan health and immigration authorities to assist migrants seeking improved 264  
conditions. Poor knowledge and lack of awareness about HBV and HCV among sub-Saharan 265  
populations undoubtedly contributes to the spread of these infections in native countries. 266

## References:

- 1- Alam M, Tariq WUZ: Knowledge, Attitudes and Practices about Hepatitis B and C among young 269  
healthy males. *Pak J Pathol* 2006, 17:147–150. 270
- 2- Allain J-P, Candotti D, Soldan K, Sarkodie F, Phelps B, Giachetti C, et al. The risk of hepatitis B 271  
virus infection by transfusion in Kumasi, Ghana. *Blood*. 2003;101(6):2419–25. 272
- 3- Ayele A, Abera D, Hailu M, Birhanu M and Desta K. Prevalence and associated risk factors for 273  
Hepatitis B and C viruses among refugees in Gambella, Ethiopia. *BMC Public Health* (2020) 274  
20:721. 275
- 4- Badawi M, Atif M, Mustafa Y. Systematic review and meta-analysis of HIV, HBV and HCV 276  
infection prevalence in Sudan. *Virology* 2018;15(1):1–16. 277
- 5- Belyhun Y, Maier M, Mulu A, Diro E, Liebert UG. Hepatitis viruses in Ethiopia: a systematic 278  
review and meta-analysis. *BMC Infect Dis*. 2016;16(1):761. 279
- 6- Burnett R, Francois G, Kew M, Leroux-Roels G, Meheus A, Hoosen A, et al. Hepatitis B virus and 280  
human immunodeficiency virus co-infection in sub-Saharan Africa: a call for further investigation. 281  
*Liver Int*. 2005;25(2):201–13. 282

- 7- Burnett R, Francois G, Kew M, Leroux-Roels G, Meheus A, Hoosen A, et al. Burgess C, Drucker 283  
E. Epidemiology of chronic hepatitis C virus infection in sub-Saharan Africa. *Lancet Infect Dis.* 284  
2002;2(5):293–302. 285
- 8- Daw MA, et al. Hepatitis C Virus in North Africa: An Emerging Threat. *The Scientific World 286*  
*Journal*. Volume 2016, Article ID 7370524, 11 pages. <http://dx.doi.org/10.1155/2016/7370524>. 287
- 9- Daw MA, El-Bouzedi A. In association with Libyan Study Group of Hepatitis & HIV. Prevalence 288  
of hepatitis B and hepatitis C infection in Libya: results from a national population based survey. 289  
*BMC Infect Dis* 2014; 14: 17. 290
- 10- De Martel C, Ferlay J, Franceschi S, Vignat J, Bray F, Forman D, et al. Global burden of cancers 291  
attributable to infections in 2008: a review and synthetic analysis. *Lancet Oncol.* (2012) 13:607– 292  
15. doi: 10.1016/S1470-2045(12)70137-7 293
- 11- Frank C, Mohamed MK, Strickland GT, Lavanchy D, Arthur RR, Magder LS, et al. The role of 294  
parenteral antischistosomal therapy in the spread of hepatitis C virus in Egypt. *Lancet* 295  
2000;355:887–891. 296
- 12- Georgel P, Schuster C, Zeisel MB, Stoll-Keller F, Berg T, Bahram S. Virus-host interactions in 297  
hepatitis C virus infection: implications for molecular pathogenesis and antiviral strategies. *Trends 298*  
*Mol Med.* 2010;16(6):277–86. 299
- 13- Goldstein ST, Zhou F, Hadler SC, Bell BP, Mast EE, Margolis HS. A mathematical model to 300  
estimate global hepatitis B disease burden and vaccination impact. *Int J Epidemiol.* (2005) 34:1329– 301  
39. doi: 10.1093/ije/dyi206 302
- 14- Gushulak BD, MacPherson DW. Globalization of infectious diseases: the impact of migration. *Clin 303*  
*Infect Dis* 2004 Jun 15; 38(12):1742e8. PMID: 15227621. 304
- 15- Hassan MA, Kim WR, Li R, Smith CI, Fried MW, Sterling RK, et al. Characteristics of US-born 305  
versus foreign-born Americans of African descent with chronic hepatitis B. *Am J Epidemiol.* (2017) 306  
186:356–66. doi: 101093/aje/kwx064. 307
- 16- Hauri AM, Armstrong GL, Hutin YJ. The global burden of disease attributable to contaminated 308  
injections given in health care settings. *Int J STD AIDS.* 2004;15(1):7–16. 309

|                                                                                                                                                                                                                                                                                                               |                          |
|---------------------------------------------------------------------------------------------------------------------------------------------------------------------------------------------------------------------------------------------------------------------------------------------------------------|--------------------------|
| 17- Howell J, Ladep NG, Lemoin M, Thursz MR, Taylor-Robinson SD. Hepatitis B in sub-saharan Africa. S Sudan Med J. 2014;7(3):59–61.                                                                                                                                                                           | 310<br>311               |
| 18- Kirbak ALS. Sero-prevalence for hepatitis B virus among pregnant women attending antenatal clinic in juba teaching hospital, republic of South Sudan. Pan Afr Med. 2017;26:72.                                                                                                                            | 312<br>313               |
| 19- Lavanchy D. The global burden of hepatitis C. Liver Int. 2009;29 Suppl 1:74–81.                                                                                                                                                                                                                           | 314                      |
| 20- Mohamed EA, Giama NH, Shaleh HM, Kerandi L, Oseini AM, Ahmed Mohammed H, et al. Knowledge, attitudes, and behaviors of viral hepatitis among recent African immigrants in the United States: a community based participatory research qualitative study. Front Public Health. 2020;8:25.                  | 315<br>316<br>317<br>318 |
| 21- Nelson PK, Mathers BM, Cowie B, Hagan H, Des Jarlais D, Horyniak D, et al. Global epidemiology of hepatitis B and hepatitis C in people who inject drugs: results of systematic reviews. Lancet. 2011;378(9791):571–83.                                                                                   | 319<br>320<br>321        |
| 22- OECD. World Migration in Figures. < <a href="http://www.oecd.org/els/mig/World-Migration-in-Figures.pdf">http://www.oecd.org/els/mig/World-Migration-in-Figures.pdf</a> >.                                                                                                                                | 322<br>323               |
| 23- Ott JJ, Stevens GA, Groeger J, Wiersma ST. Global epidemiology of hepatitis B virus infection: new estimates of age-specific HBsAg seroprevalence and endemicity. Vaccine. (2012) 30:2212–9. doi: 10.1016/j.vaccine.2011.12.116                                                                           | 324<br>325<br>326        |
| 24- Owiti JA, Greenhalgh T, Sweeney L, Foster GR, Bhui KS. Illness perceptions and explanatory models of viral hepatitis B & C among immigrants and refugees: a narrative systematic review. BMC Public Health. 2015; 15:151.                                                                                 | 327<br>328<br>329        |
| 25- Perz JF, Armstrong GL, Farrington LA, Hutin YJ, Bell BP. The contributions of hepatitis B virus and hepatitis C virus infections to cirrhosis and primary liver cancer worldwide. J Hepatol. 2006;45(4):529–38.                                                                                           | 330<br>331<br>332        |
| 26- Saeed, FMA, Ongerth, JE, 2019. Giardia and Cryptosporidium in children with diarrhea, Kufra Libya, a North African migration route city. International Journal of Hygiene and Environmental Health. 222(5):840-846. <a href="https://doi.org/jijheh.2019.04.006">https://doi.org/jijheh.2019.04.006</a> . | 333<br>334<br>335        |



- 27- Saaed, FMA, Ongerth, JE, 2022. Prevalence of hepatitis B and hepatitis C in migrants from sub-Saharan Africa newly arrived at Al Kufra in SE Libya in transit toward Europe. MEDRXIV/2022/27021.
- 28- Schilling T, Rauscher S, Menzel C, Reichenauer S, Müller-Schilling M, Schmid S, et al. Migrants and refugees in Europe: challenges, experiences and contributions. *Visc Med.* 2017;33(4):295–300.
- 29- Seeger C, Mason WS. Hepatitis B virus Biology. *Micro Mol Biol Rev* 2000; 64: 51-68.
- 30- Sharma S, Carballo M, Feld JJ, Janssen HLA. Immigration and viral hepatitis. *Journal of Hepatology.* 2015; 63: 515–522.
- 31- Shalaby S, Kabbash I, El Saleet G, Mansour N, Omar A, El Nawawy A. Hepatitis B and C viral infection: prevalence, knowledge, attitude and practice among barbers and clients in Gharbia governorate, Egypt. *East Mediterr Health J.* 2010;16:10–7.
- 32- Stanaway JD, Flaxman AD, Naghavi M, Fitzmaurice C, Vos T, Abubakar I, et al. The global burden of viral hepatitis from 1990 to 2013: findings from the Global Burden of Disease Study 2013. *Lancet.* (2016) 388:1081–8. doi: 10.1016/S0140-6736(16)30579-7
- 33- Strong C, Hur K, Kim F, Pan J, Tran S, Juon H-S. Sociodemographic characteristics, knowledge and prevalence of viral hepatitis infection among vietnamese Americans at community screenings. *J Immigr Minor Health* 2015;17:298–301.
- 34- Taylor VM, Jackson JC, Pineda M, Pham P, Fischer M, Yasui Y. Hepatitis B knowledge among Vietnamese immigrants: implications for prevention of hepatocellular carcinoma. *J Cancer Educ* 2000;15:51–55.
- 35- Tramuto F, Maida CM, Colomba GM, Di Carlo P, Mazzola G, Li Vecchi V, et al. Occult hepatitis B infection in the immigrant population of Sicily, Italy. *J Immigr Minor Health.* (2013) 15:725–31. doi: 10.1007/s10903-012-9699-y
- 36- Tugwell P, Pottie K, Welch V, Ueffing E, Chambers A, Feightner J, et al. Evaluation of evidence-based literature and formulation of recommendations for the clinical preventive guidelines for immigrants and refugees in Canada. *CMAJ* 2011;183:E933–E938.
- 37- UNHCR. Ethiopia refugee response plan; 2018. p. 1–68.

- 38- UN. UN International Migration Wallchart 2013. [Http://www.un.org/en/development/desa/population/publications/migration/migration-wallchart-2013.shtml](http://www.un.org/en/development/desa/population/publications/migration/migration-wallchart-2013.shtml). 363  
364
- 39- Who.int. WHO | Hepatitis C [Internet]. 2015 [cited 16 October 2015]. Available from: <http://www.who.int/mediacentre/factsheets/fs164/en/>. 365  
366
- 40- World Health Organization: Advocacy, communication and social mobilization for TB control: a guide to developing knowledge, attitude and practice surveys. [http://whqlibdoc.who.int/publications/2008/9789241596176\\_eng.pdf](http://whqlibdoc.who.int/publications/2008/9789241596176_eng.pdf). 367  
368  
369
- 41- World Health Organisation. Hepatitis: Fact sheets. Geneva: WHO. Available from: [www. http://www.who.int/topics/hepatitis/factsheets/en/](http://www.who.int/topics/hepatitis/factsheets/en/). Accessed on: 17 May 2014. 370  
371
- 42- Yang JD, Roberts LR. Hepatocellular carcinoma: a global view. *Nat Rev Gastroenterol Hepatol*. (2010) 7:448–58. doi: 10.1038/nrgastro.2010.100 372  
373
- 43- Yang JD, Gyedu A, Afihene MY, Duduyemi BM, Micah E, Kingham TP, et al. Hepatocellular carcinoma occurs at an earlier age in africans, particularly in association with chronic hepatitis B. *Am J Gastroenterol*. (2015) 110:1629–31. doi: 10.1038/ajg.2015.289 374  
375  
376
- 44- Yang JD, Mohamed EA, Aziz AO, Shousha HI, HashemMB, NabeelMM, et al. Characteristics, management, and outcomes of patients with hepatocellular carcinoma in Africa: a multicountry observational study from the Africa Liver Cancer Consortium. *Lancet Gastroenterol Hepatol*. (2017) 2:103–11. doi: 10.1016/S2468-1253(16)30161-3 377  
378  
379  
380  
381

## Appendix

382

**Table A1. Questions on Knowledge of study participating migrants about HBV and HCV**

383

| Knowledge Questions                                                                                     | Yes (%)     | No (%)      | Don't know (%) |
|---------------------------------------------------------------------------------------------------------|-------------|-------------|----------------|
| <b>General questions:</b>                                                                               |             |             |                |
| 1. Have you ever heard about viral hepatitis?                                                           | 115 (17.1%) | 472(70.0%)  | 87(12.9%)      |
| 2. Are Hepatitis B and C viral infection diseases?                                                      | 53 (7.9%)   | 500(74.2%)  | 121(18.0%)     |
| 3. Can hepatitis B or C be transmitted by contact with open wound/cut?                                  | 41 (6.1%)   | 490(72.7%)  | 143(21.2%)     |
| 4. Can hepatitis B and C virus be spread by someone who looks healthy?                                  | 58 (8.6%)   | 405(60.1%)  | 211(31.3%)     |
| 5. Is there a test that shows whether or not someone is hepatitis B or C positive?                      | 62 (9.2%)   | 304(45.1%)  | 308(45.7%)     |
| 6. Do you think people with hepatitis B can be infected for life?                                       | 36 (5.3%)   | 411(61.0%)  | 227(33.7%)     |
| 7. Is there a vaccine for HBV?                                                                          | 37 (5.5%)   | 298(44.2%)  | 339(50.3%)     |
| 8. Can hepatitis B be cured?                                                                            | 202(30.0%)  | 91 (13.5%)  | 381(56.5%)     |
| 9. Can hepatitis C be cured?                                                                            | 130(19.3%)  | 319(47.3%)  | 225(33.4%)     |
| 10. Can HBV and HCV infection be passed from mother to child?                                           | 117 (17.4%) | 205(30.4%)  | 352(52.2%)     |
| 11. Can HBV and HCV be spread through social contact (e.g. shaking hands, sharing food or sneezing)?    | 362(53.7%)  | 68(10.1%)   | 244(36.2%)     |
| 12. Can hepatitis infection cause death?                                                                | 147 (21.8%) | 196(29.1%)  | 331(49.1%)     |
| 13. Can people with Hepatitis B or C donate blood?                                                      | 411 (61.0%) | 166 (24.6%) | 97 (14.4%)     |
| 14. Can HCV infection be prevented?                                                                     | 427 (63.4%) | 126 (18.7%) | 121(18.0%)     |
| 15. Can HBV infection be prevented?                                                                     | 234(34.7%)  | 247(36.6%)  | 193(28.6%)     |
| 16. Can Hepatitis B and C be transmitted through air and water?                                         | 398 (59.1%) | 97 (14.4%)  | 179(26.6%)     |
| 17. Have you ever been screened for HBV and HVC?                                                        | 115 (17.1%) | 559 (82.9%) | 0 (00.00%)     |
| 18. Have you been vaccinated against hepatitis B?                                                       | 11 (1.6%)   | 663 (98.4%) | 0 (00.00%)     |
| 19. Is a vaccine for Hepatitis C available?                                                             | 13 (61.3%)  | 93 (13.8%)  | 168 (24.9%)    |
| <b>Significant risk factor questions:</b>                                                               |             |             |                |
| 20. Can HBV and HCV be transmitted by un-sterilized syringes and needles?                               | 66 (9.8%)   | 298 (44.2%) | 310 (46.0%)    |
| 21. Are HBV and HCV passed through contact with infectious blood, blood products and body fluids?       | 39 (5.8%)   | 290 (43.0%) | 345 (51.2%)    |
| 22. Can viral hepatitis B and C be transmitted by sharing needles for use drug?                         | 70 (10.4%)  | 404 (59.9%) | 200(29.7%)     |
| 23. Can viral hepatitis B and C be transmitted by tattooing or body piercing?                           | 44 (6.5%)   | 294 (43.6%) | 336 (49.9%)    |
| 24. Can viral hepatitis B and C be transmitted by sharing personal care items like toothbrush or razor? | 60 (8.9%)   | 198 (29.4%) | 416(61.7%)     |
| 25. Can hepatitis B and C be transmitted through sexual contact?                                        | 83 (12.3%)  | 229 (34.0%) | 362 (53.7%)    |
| 26. Can HBV and HCV be transmitted by a lack of sanitation services like bathrooms?                     | 257 (38.1%) | 121(18.0%)  | 296 (43.9%)    |
| <b>Common complications questions:</b>                                                                  |             |             |                |
| 27. Can a person be a carrier of HBV and HCV and can infect others without knowing it?                  | 88 (13.1%)  | 310 (46.0%) | 276(40.9%)     |
| 28. Can HBV and HCV infections result in chronic hepatitis?                                             | 112(16.6%)  | 223 (33.1%) | 339 (50.3%)    |
| 29. Can HBV and HCV infections result in liver cancer?                                                  | 97 (14.4%)  | 174 (25.8%) | 403 (59.8%)    |
| 30. Can HBV and HCV infections lead to liver cirrhosis?                                                 | 78 (11.6%)  | 198 (29.4%) | 398 (59.1%)    |
| 31. Can HBV and HCV infections lead to fulminant hepatitis?                                             | 57 (8.5%)   | 157 (23.3%) | 460 (68.2%)    |
| 32. Can HBV and HCV infections cause yellow skin and eyes (jaundice) ?                                  | 72 (10.7%)  | 234 (34.7%) | 368 (54.6%)    |
| 33. Can HBV and HCV infections cause liver failure?                                                     | 112 (16.6%) | 262 (38.9%) | 300 (44.5%)    |
| 34. Can HBV and HCV infections cause death?                                                             | 58 (8.6%)   | 287 (42.6%) | 329 (48.8%)    |

384

385

386

**Table A2. Questions regarding Attitude of participating migrants about HBV and HCV**

387

| Attitude assessment questions                                                                             | Definitely Agree | Moderately agree | Neutral    | Moderately disagree | Definitely Disagree |
|-----------------------------------------------------------------------------------------------------------|------------------|------------------|------------|---------------------|---------------------|
| 1. I have no concern for being infected with Hepatitis B or C.                                            | 83(12.3%)        | 164(24.3%)       | 295(43.8%) | 80(11.9%)           | 52(7.7%)            |
| 2. Hepatitis B vaccine is safe and effective.                                                             | 23(3.4%)         | 36(5.3%)         | 369(54.7%) | 176(26.1%)          | 70(10.4%)           |
| 3. All African migrant populations should be tested for hepatitis B or C before they receive health care. | 38(5.6%)         | 74(11.0%)        | 259(38.4%) | 198(29.4%)          | 105(15.6%)          |
| 4. I don't feel comfortable to live with people with Hepatitis B or C.                                    | 20(3.0%)         | 64(9.5%)         | 446(66.2%) | 121(18.0%)          | 23(3.4%)            |
| 5. I believe that hepatitis infections can be transmitted through food.                                   | 49(7.3%)         | 182(27.0%)       | 340(50.4%) | 78(11.6%)           | 25(3.7%)            |
| 6. I think hepatitis B is a curable disease.                                                              |                  |                  |            |                     |                     |
| 7. I think that hepatitis B and C is a serious public health problem.                                     | 87(12.9%)        | 167(24.8%)       | 369(54.7%) | 27(4.0%)            | 24(3.6%)            |
| 8. I can get hepatitis infection.                                                                         | 119(17.7%)       | 138(20.5%)       | 285(42.3%) | 96(14.2%)           | 36(5.3%)            |
| 9. Viral hepatitis is something to worry about.                                                           | 45(6.7%)         | 91(13.5%)        | 341(50.6%) | 138(20.5%)          | 59(8.8%)            |
| 10. I believe that vaccination could prevent transmission.                                                | 33(4.9%)         | 74(11.0%)        | 260(38.6%) | 221(32.8%)          | 86(12.8%)           |
| 11. I believe that healthy people need vaccination.                                                       | 49(7.3%)         | 111(16.5%)       | 244(36.2%) | 197(29.2%)          | 73(10.8%)           |
| 12. I believe that you need a vaccination at your age.                                                    | 27(4.0%)         | 117(17.4%)       | 221(32.8%) | 243(36.1%)          | 66(9.8%)            |
| 13. I believe that vaccine can be free or low cost through certain programs.                              | 22(3.3%)         | 70(10.4%)        | 503(74.6%) | 41(6.1%)            | 38(5.6%)            |
|                                                                                                           | 34(5.0%)         | 38(5.6%)         | 267(39.6%) | 188(27.9%)          | 147(21.8%)          |

388

**Table A3. Questions regarding Practices of participating migrants about HBV and HCV**

389

| Practice Assessment Questions                                                                               | Always     | Frequently | Sometimes  | Rarely     | Never       |
|-------------------------------------------------------------------------------------------------------------|------------|------------|------------|------------|-------------|
| 1. How often do you go for further investigation and treatment, if you are diagnosed with hepatitis B or C? | 11(01.63%) | 7(01.03%)  | 12(01.78%) | 9(01.33%)  | 635(94.21%) |
| 2. How often are social networks on the internet your source of hepatitis B or C information?               | 15(02.22%) | 2(00.29%)  | 5(00.74%)  | 11(01.63%) | 641(95.10%) |
| 3. How often are friends as your source of hepatitis B or C information?                                    | 13(1.9%)   | 10(1.5%)   | 17(2.5%)   | 14(2.1%)   | 620(92.0%)  |
| 4. How often do you use a used needle/syringe by more than one person?                                      | 47(21.8%)  | 155(23.0%) | 187(27.7%) | 108(16.0%) | 77(11.4%)   |
| 5. How often do you share intravenous drug use?                                                             | 134(19.9%) | 144(21.4%) | 173(25.7%) | 127(18.8%) | 96(14.2%)   |
| 6. How often are razors and shaving blades used by more than one person?                                    | 366(54.3%) | 247(36.6%) | 36 (5.3%)  | 14(2.1%)   | 11(1.6%)    |
| 7. How often do you screen for hepatitis B or C?                                                            | 5(.7%)     | 11(1.6%)   | 97(14.4%)  | 2(.3%)     | 559(82.9%)  |
| 8. How often have you had sex within the last 12 months?                                                    | 147(21.8%) | 175(26.0%) | 197(29.2%) | 80(11.9%)  | 75(11.1%)   |
| 9. How often have you used condoms with non-steady/steady sexual partners within the last 12 months?        | 5(.7%)     | 2(.3%)     | 7(1.0%)    | 2(.3%)     | 658(97.6%)  |
| 10. How often do you wash hands with tap water and soap?                                                    | 71(10.5%)  | 93(13.8%)  | 142(21.1%) | 161(23.9%) | 207(30.7%)  |
| 11. How often do you refuse shaving with used instruments?                                                  | 46(6.8%)   | 114(16.9%) | 127(18.8%) | 143(21.2%) | 244(36.2%)  |
| 12. How often do you share eating utensils?                                                                 | 627(93.0%) | 20(3.0%)   | 14(2.1%)   | 8(1.2%)    | 5(.7%)      |

390
